# Supplementary material for: Proteomic analysis reveals dysregulated cell signaling in ejaculated spermatozoa from infertile men
Source: PubMed Central journal article supplement — Asian J Androl. 2018 Oct 26;21(2):121–30. doi: 10.4103/aja.aja_56_18 (PMC6413549; doi:10.4103/aja.aja_56_18), 2018-10-26
Supplement: AJA-21-121_Suppl1.pdf [file AJA-21-121_Suppl1.pdf]

### Full names of abbreviated proteins in Figure 2

CCT2: T-complex protein 1 subunit beta  
CCT3: T-complex protein 1 subunit gamma  
CCT4: T-complex protein 1 subunit theta  
CCT5: T-complex protein 1 subunit epsilon  
CCT6A: T-complex protein 1 subunit zeta  
CCT7: T-complex protein 1 subunit eta  
CCT8: T-complex protein subunit 1 theta  
DARS: Aspartate--tRNA ligase, cytoplasmic  
DNAJA1: DnaJ homolog subfamily A member 1  
DNCAJA2: DnaJ homolog subfamily A member 2  
DNAJC3: DnaJ homolog subfamily C member 3  
DYNC1H1: Cytoplasmic dynein 1 heavy chain 1  
DYNC1LI1: Cytoplasmic dynein 1 light intermediate chain 1  
EEF1E1: Eukaryotic translation elongation factor 1 epsilon-1  
EEF1D: Elongation factor 1-delta  
FAM162A: Protein FAM162A  
HSPA1L: Heat shock 70 kDa protein 1-like  
HSPA2: Heat shock-related 70 kDa protein 2  
HSPA8: Heat shock cognate 71 kDa protein  
HSP90AA1: Heat shock protein HSP 90-alpha  
PPP2CB: Serine/threonine-protein phosphatase 2A catalytic subunit beta isoform  
PPP4R1: Serine/threonine-phosphatase 4 regulatory subunit 1 isoform  
RPLP0: 60S acidic ribosomal protein P0  
RPLP2: 60S acidic ribosomal protein P2  
RPL12: 60S ribosomal protein L12  
RPS16: 40S ribosomal protein S16  
SSR1: Translocon-associated protein subunit alpha  
St13: Hsc70-interacting protein  
STIP1: Stress-induced-phosphoprotein 1PSMO4  
TCP1: T-complex protein subunit  
TRAP1: Heat shock protein 75 kDa, mitochondrial  
TUBB4B: Tubulin beta-4B chain  
VARS: Valine--tRNA ligase  
IDH1: Isocitrate dehydrogenase [NADP] cytoplasmic  
ACTR1A: Alpha-centractin  
APOA1: Apolipoprotein A-I  
ATP5F1: ATP synthase F(0) complex subunit B1, mitochondrial  
ATP5I: ATP synthase subunit e, mitochondrial  
ATP5J: ATP synthase-coupling factor 6, mitochondrial  
CANX: Calnexin  
CAPZA1: F-actin-capping protein subunit alpha-1  
CALR: ClaR protein  
CLIC1: Chloride intracellular channel protein 1  
DCTN2: Dynactin subunit 2  
DNAJB1: DnaJ homolog subfamily B member 1  
ERP29: Endoplasmic reticulum resident protein 29  
ERO1LB: ERO1-like protein beta  
FKBP2: Peptidyl-prolyl cis-trans isomerase FKBP2  
HSPA5: Endoplasmic reticulum chaperone BiP  
HSP90B1: Endoplasmic  
LPL: Lipoprotein lipase  
P4HB: Protein disulfide-isomerase  
PDIA3: Protein disulfide-isomerase A3  
PP1A: Peptidyl-prolyl cis-trans isomerase A  
PPIB: Peptidyl-prolyl cis-trans isomerase B  
PRDX1: Peroxiredoxin-1  
PRDX2: Peroxiredoxin-2  
PRDX4: Peroxiredoxin-4

PTPMT1: Phosphatidylglycerophosphatase and protein-tyrosine phosphatase 1  
RAB6A: Ras-related protein Rab-6A  
RAB7A: Ras-related protein Rab-7a  
SDF2L1: Stromal cell-derived factor 2-like protein 1  
SEL1L: Protein sel-1 homolog 1  
TXN: Thioredoxin  
TXNDC2: Thioredoxin domain-containing protein 2  
VDAC1: Voltage-dependent anion-selective channel protein 3  
VDAC2: Voltage-dependent anion-selective channel protein 2  
VDAC3: Voltage-dependent anion-selective channel protein 3  
ACTB: Actin, cytoplasmic 1  
ANXA1: Annexin A1  
ANXA2: Annexin A1  
CYB5R3: NADH-cytochrome b5 reductase 3  
CAPNS1: Calpain small subunit 1  
CSE1L: Exportin-2  
CTSD: Cathepsin D  
HIST1H1T: Histone H1t  
HSPB1: Heat shock protein beta-1  
KPNA2: Importin subunit alpha-1  
KPNA3: Importin subunit alpha-4  
KPNA4: Importin subunit alpha-3  
KPNB1: Importin subunit beta-1  
MME: Neprilysin  
NDUFB4: NADH dehydrogenase [ubiquinone] 1 beta subcomplex subunit 4  
PABPC1: Polyadenylate-binding protein 1  
PDCD5: Programmed cell death protein 5  
PO5: Sperm protamine P5  
PPP2R1A: Serine/threonine-protein phosphatase 2A 65 kDa regulatory subunit A alpha isoform  
PSMC3: 26S proteasome regulatory subunit 6A  
PSMC4: 26S proteasome regulatory subunit 6B  
PSMD5: 26S proteasome non-ATPase regulatory subunit 5  
PSMC6: 26S proteasome regulatory subunit 10B  
PSMD7: 26S proteasome non-ATPase regulatory subunit 7  
PSMD8: 26S proteasome non-ATPase regulatory subunit 8  
PSMD13: 26S proteasome non-ATPase regulatory subunit 13  
RAB1A: Ras-related protein Rab-1A  
RAN: GTP-binding nuclear protein Ran  
RFL4: RFL4 protein  
RPL19: 60S ribosomal protein L19  
RUVBL2: RuvB-like 2  
RPL15: 60S ribosomal protein L15  
YWHAQ: 14-3-3 protein theta

### Full names of abbreviated proteins in Figure 3

CD1: cluster of differentiation 1  
eNOS: Endothelial NOS  
ERK/MAPK: extracellular signal -regulated kinase/ mitogen activated protein kinase 1  
EIF2: Eukaryotic Initiation Factor 2  
EIF4: Eukaryotic initiation factor 4  
G2M: G2 phase  
mTOR: mechanistic target of rapamycin  
NRF2: Nuclear factor (erythroid-derived 2)-like 2  
P13k/AK: phosphoinositide 3-kinase (PI3K)/protein kinase B  
P14K/AKT: phosphatidylinositol 4-kinases/ protein kinase B  
P70S6K: Ribosomal protein S6 kinase beta-1 (S6K1)

PPARc/RXα: Peroxisome proliferator-activated receptor alpha  
THOP1: Thimet Oligopeptidase 1

**Full names of abbreviated proteins in Figure 4**

ACP1: Acid Phosphatase 1  
DNAJ2: DnaJ homolog subfamily A member 2  
DNAJC3: DnaJ homolog subfamily member C3  
DNAJA1: DnaJ homolog subfamily A member 1  
DNAJB1: DnaJ homolog subfamily B member 1  
DNAJB11: DnaJ homolog subfamily B member 11  
HSP90AA1: Heat shock protein HSP 90-alpha  
HSP90B1: Heat shock protein HSP 90-beta 1  
H5PA5: Endoplasmic reticulum chaperone BiP  
HSC70: Heat shock cognate 71 kDa protein (Hsc70)  
PRDX1: Peroxiredoxin-1  
STIP1: Stress-induced-phosphoprotein 1  
TXN: Thioredoxin  
YWHAQ: 14-3-3 protein theta  
YWHAB: 14-3-3 protein beta/alpha  
APOA1: Apolipoprotein A-I  
CALR: Calreticulin

LPL: Lipoprotein lipase  
PDIA3: Protein disulfide-isomerase A3  
PSMC3: 26S proteasome regulatory subunit 6A  
PSMC4: 26S proteasome regulatory subunit 6B  
PSMC6: 26S proteasome regulatory subunit 10B  
ANEP: Anti-neuroexcitation peptide 3  
CALR: Calreticulin  
DNAJA1: DnaJ homolog subfamily A member 1  
DNAJB1: DnaJ homolog subfamily B member 1  
DNAJB11: DnaJ homolog subfamily A member 11  
HSPA5: Endoplasmic reticulum chaperone BiP  
HSPB1: Heat shock protein beta-1  
PABPC1: Polyadenylate-binding protein 1  
PDIA3: Protein disulfide-isomerase A3  
PSMC3: 26S proteasome regulatory subunit 6A  
PSMC6: 26S proteasome regulatory subunit 10B  
PSMD4: 26S proteasome regulatory subunit 4  
PPP2R1A: Serine/threonine-protein phosphatase 2A 65 kDa regulatory subunit A alpha isoform  
PRDX1: Peroxiredoxin-1  
TXN: Thioredoxin
